# Supplementary material for: Polyphenols Coordinated with Cu (II) in an Aqueous System Build Ion-Channel Coatings on Hair Surfaces
Source: MDPI journal article supplement (doi:10.3390/ma16041333), 2023-02-04
Supplement: s1 [file s1]

*Supplementary Material*

## **Polyphenols Coordinated with Cu (II) in an Aqueous System Build ion Channel Coatings on Hair Surfaces**

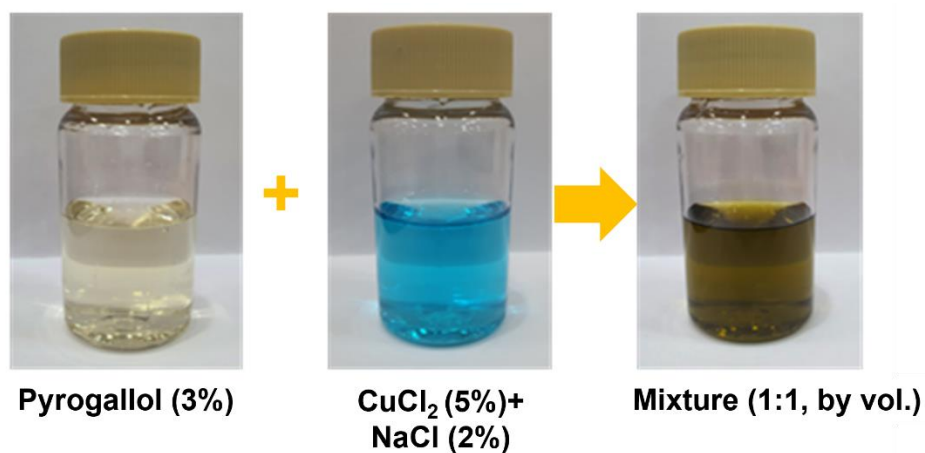

Figure S1. Photographs of Pyrogallol, CuCl<sub>2</sub> + NaCl, oligomer mixture solution mixture.

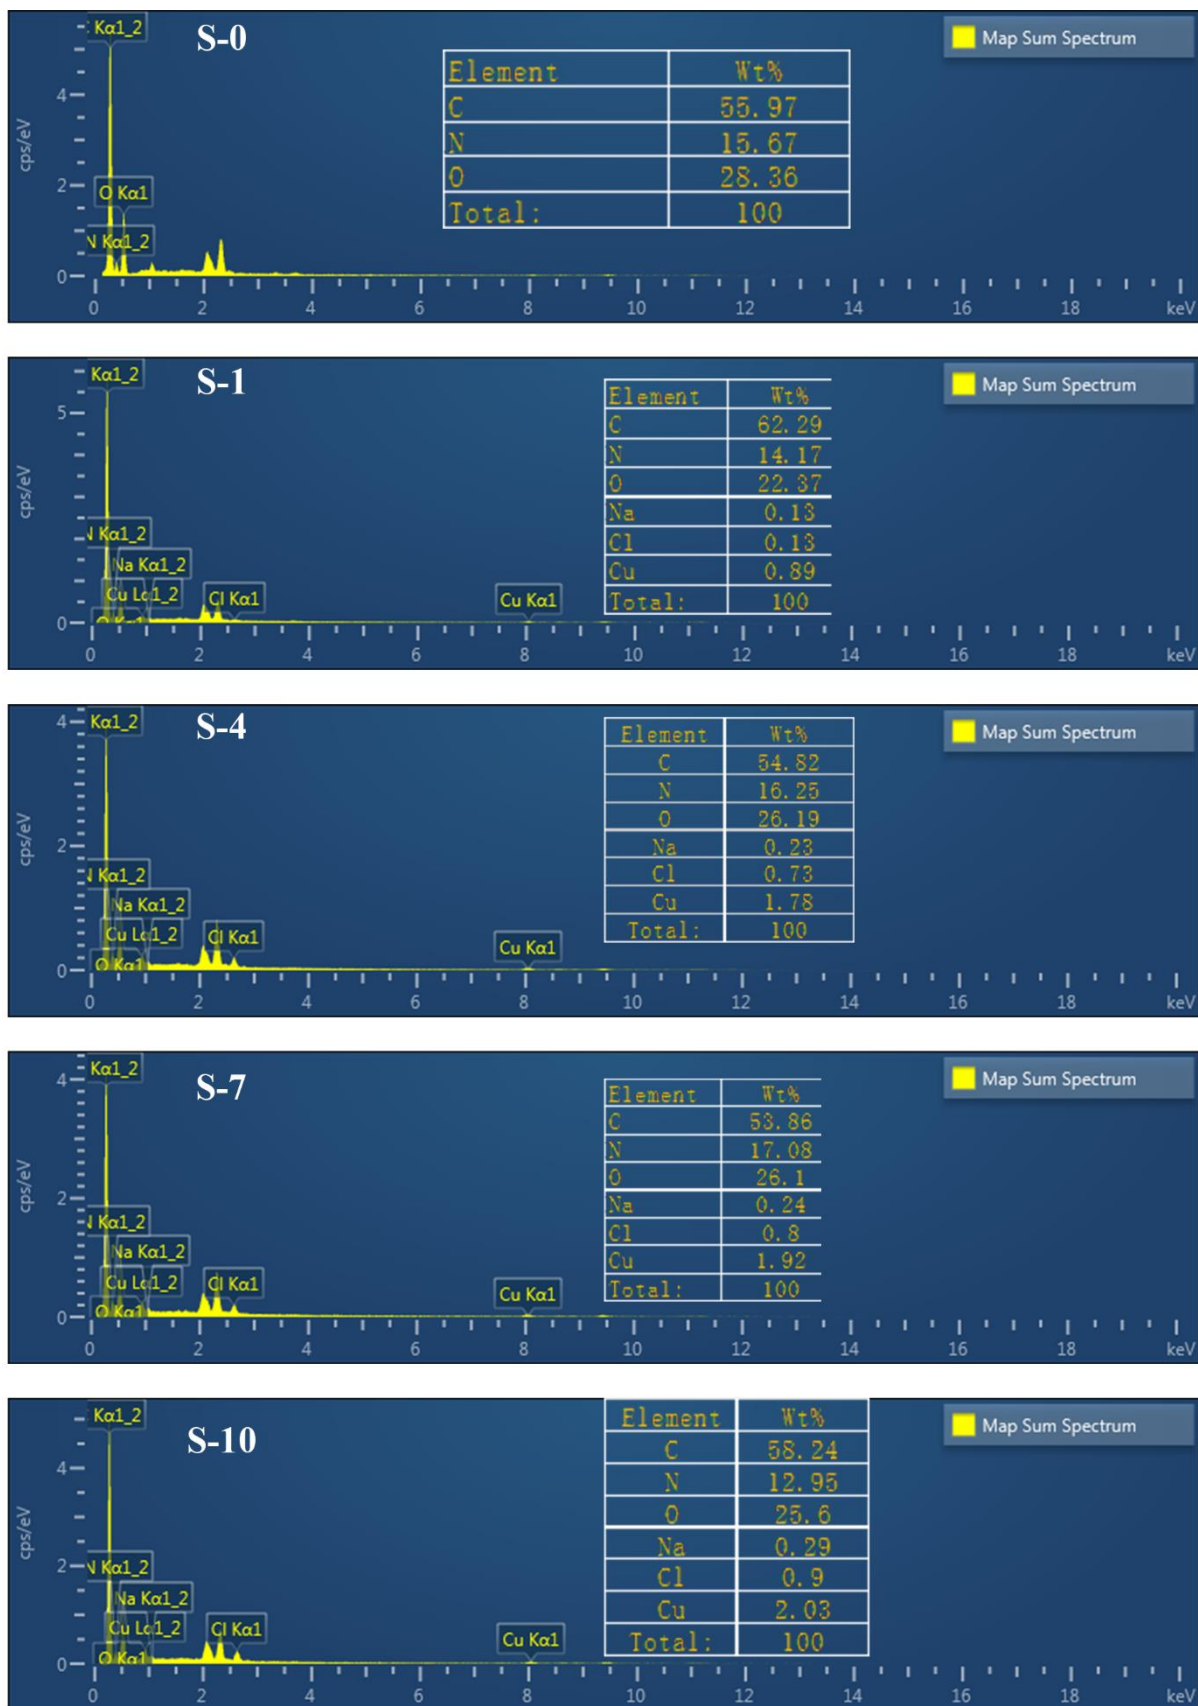

Figure S2. Elements distributed on the hair surface.

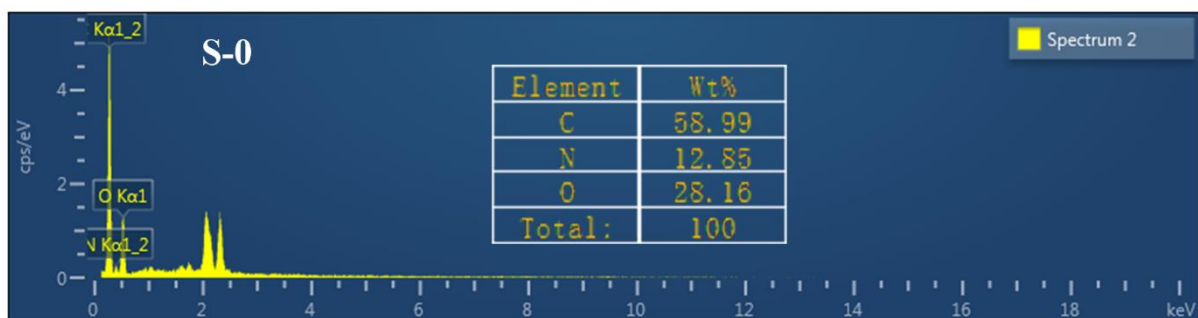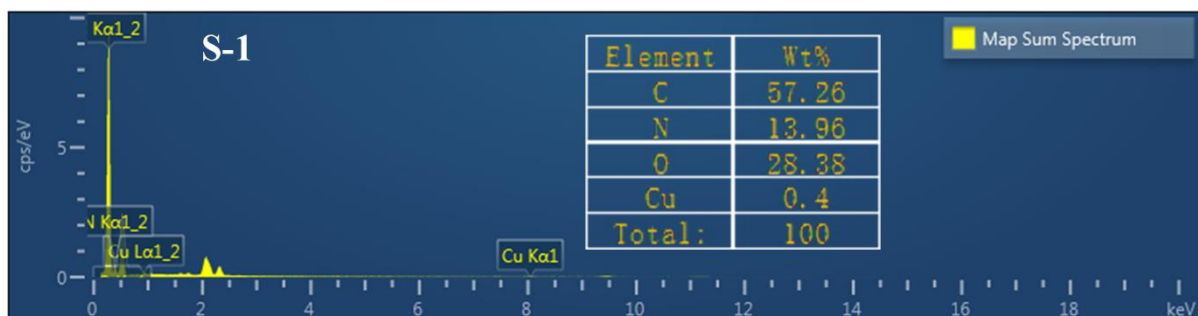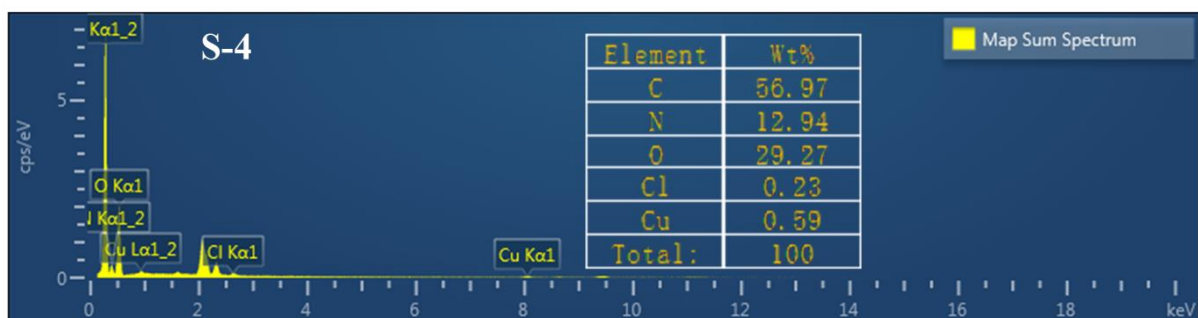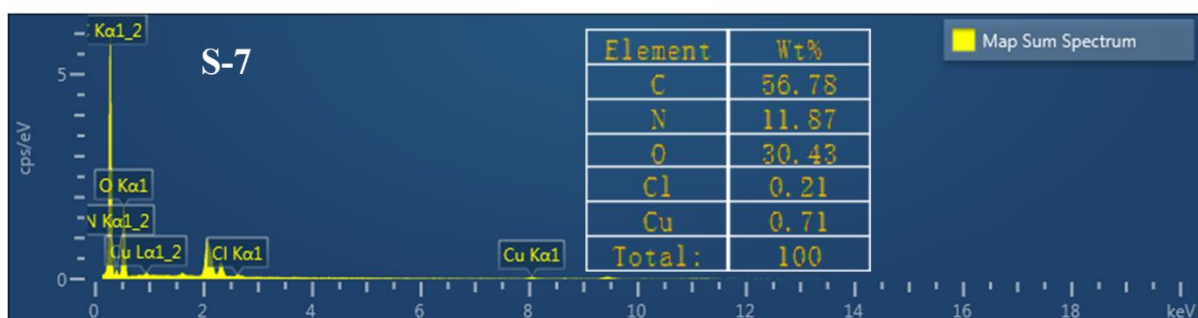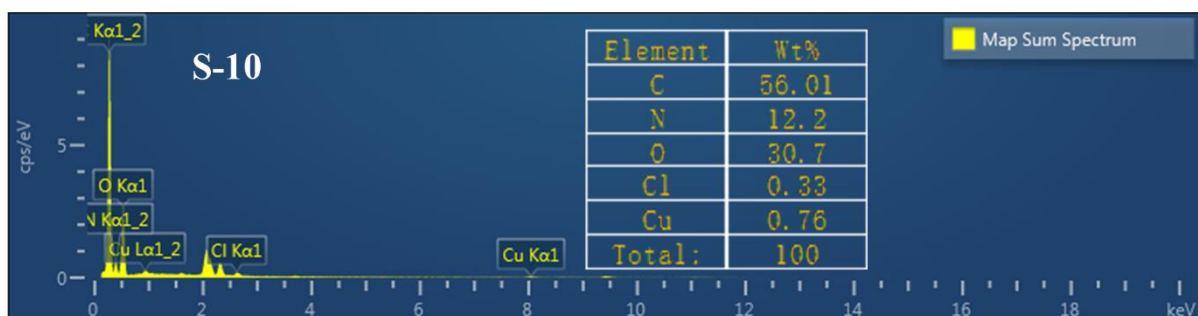

Figure S3. Elements distributed on the hair cross-section.

Table S1. Comparing thickness and tensile strength of hair dyed by commercial products and gallic acid-based dye.

| Samples   | Thickness (mm) |        | Tensile Strength (N/mm <sup>2</sup> ) |        |
|-----------|----------------|--------|---------------------------------------|--------|
|           | Before         | After  | Before                                | After  |
| C-A       | 0.0557         | 0.045  | 185.79                                | 361.5  |
| C-B       | 0.056          | 0.039  | 180.9                                 | 400    |
| C-C       | 0.055          | 0.046  | 186.21                                | 391.5  |
| C-D       | 0.054          | 0.049  | 179.65                                | 408.7  |
| C-E       | 0.0553         | 0.0511 | 183.78                                | 386.1  |
| This work | 0.055          | 0.0652 | 182.79                                | 335.32 |

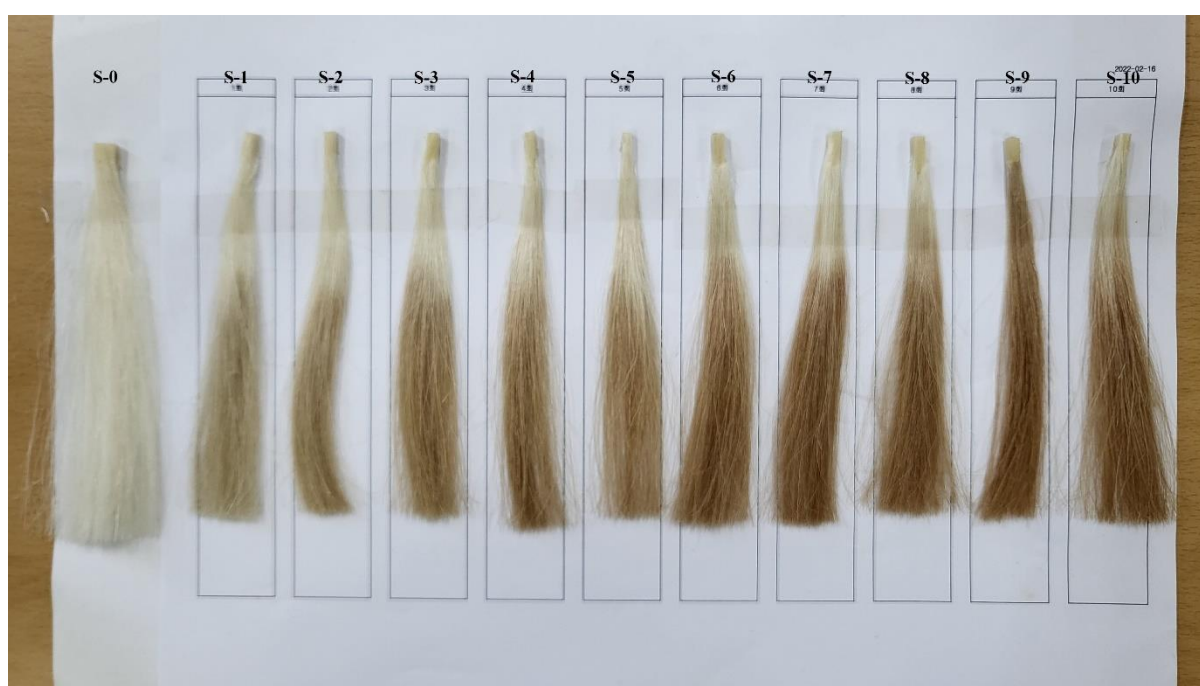

Figure S4. Photographs of the hair samples.

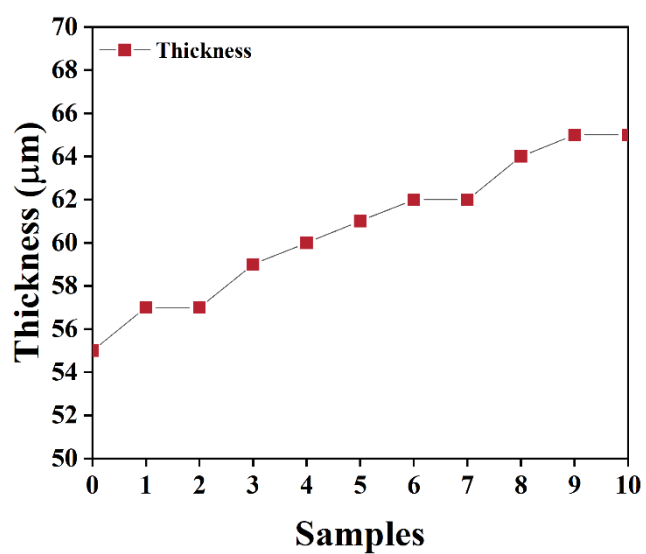

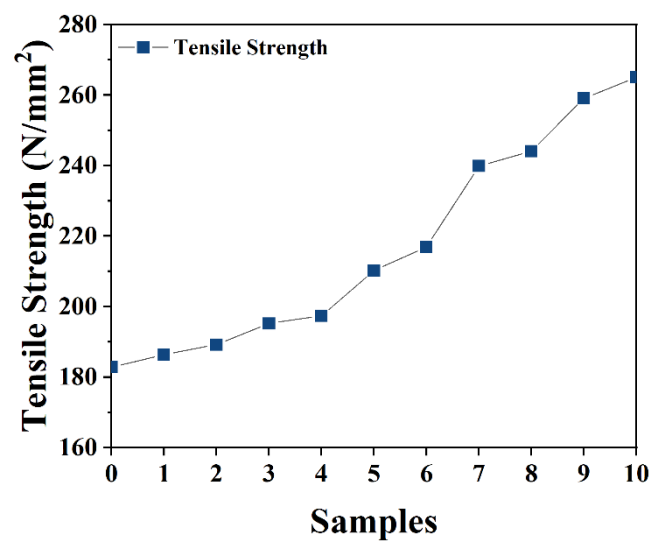

Figure S5. Thickness and tensile strength of the hair before and after the dyeing with pyrogallol.
